# Supplementary material for: Plasma polymerisation of an allyl organophosphate monomer by atmospheric pressure pulsed-PECVD: insights into the growth mechanisms
Source: Royal Society of Chemistry journal article supplement (doi:10.1039/c4ra11625a), 2014-11-27
Supplement: c4ra11625a1.pdf [file c4ra11625a1.pdf]

## Plasma Polymerisation of an Allyl Organophosphate Monomer by Atmospheric Pressure Pulsed-PECVD: Insights Into The Growth Mechanisms

F.Hilt, D. Duday, N. Gherardi, G. Frache, D. Didierjean, J. Bardon and P. Choquet

### SUPPORTING INFORMATION

Table S1. Tentative assignment of top-30 negative secondary ions among 414 automatically detected negative ions in the mass range 1-200 as sorted by PCA, showing a trend from more organic (negative loadings) to inorganic (positive loadings) composition of the investigated films.

| Tentative assignment of top-30 negatively loaded peaks (PC1)                                                                                                                                                                                                                                                                                                         | Tentative assignment of top-30 positively loaded peaks (PC1)                                                                                                                                                                                                                                                                         |
|----------------------------------------------------------------------------------------------------------------------------------------------------------------------------------------------------------------------------------------------------------------------------------------------------------------------------------------------------------------------|--------------------------------------------------------------------------------------------------------------------------------------------------------------------------------------------------------------------------------------------------------------------------------------------------------------------------------------|
| $P_2OH_4$ , $C_2PO$ , $C_3OH$ , $C_3O$ , $C_2HPO$ , $C_2H_3$ ,<br>$CH_2PO_4$ , $C_2HP$ , $C_2HPO_2$ , $C_3H_3$ , $C_2OH$ ,<br>$CH_2$ , $C_2H_4PO_3$ , $CH_3PN$ , $C_3H_9PO_4$ , $C_2H_3O$ ,<br>$H_2$ , $C_2H_6PO_4$ , $C_4H_4$ , $PO_4H$ , $C_4H_6PO_3$ ,<br>$C_3H_2PO$ , $CH_2P$ , $H_3PO_4$ , $CH$ , $C_2H$ , $C_3H_2$ ,<br>$C_3H_2PO_2$ , $C_4H_5$ , $C_4H_8PO_3$ | $CH_2PO_2$ , $CP_2NO_6$ , $P$ , $OH$ , $P_2NO_4H_2$ ,<br>$NH_2$ , $NH$ , $P_2N_2O_5$ , $PNOH$ , $P_3NO_3H$ ,<br>$PNO_2H$ , $P_2NO_4H$ , $CPN_2O_2$ , $P_2NO_2$ , $PNO$ ,<br>$CP_2NO_5$ , $CHP_2O_4$ , $PO_4$ , $Cl$ , $PNO_7$ , $P_3O_6$ ,<br>$F$ , $O$ , $^{18}O$ , $P_2NO_3$ , $P_2NO_3H_2$ , $NO$ , $O_2H$ ,<br>$O_2$ , $P_2NO_4$ |

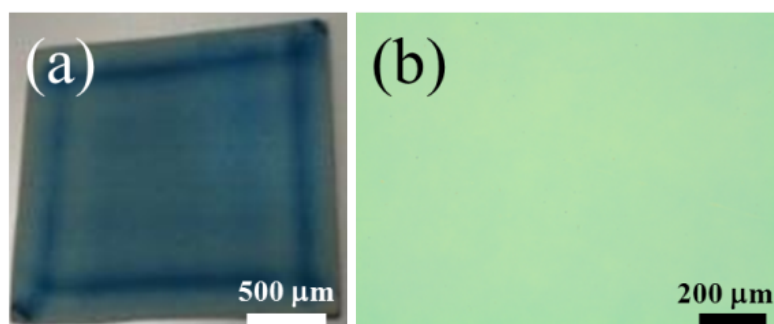

Figure S1. Top-view (a) photograph and (b) optical microscopy picture, of the film produced using a DC of 3% for a power density of  $1.0 \text{ W} \cdot \text{cm}^{-2}$ .

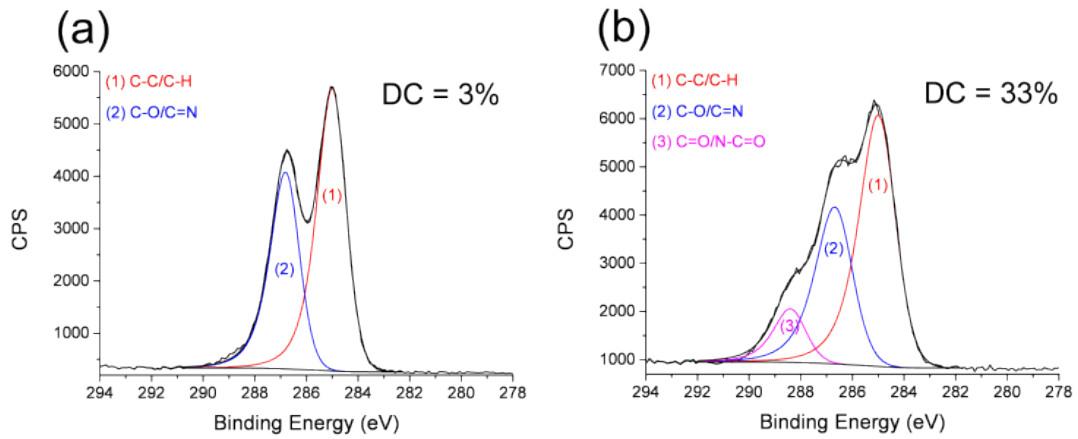

Figure S2. XPS curve-fitting of the C 1s core level of the films produced at a power density of  $1.0 \text{ W} \cdot \text{cm}^{-2}$  and a DC of 3% (a) and of 33% (b).

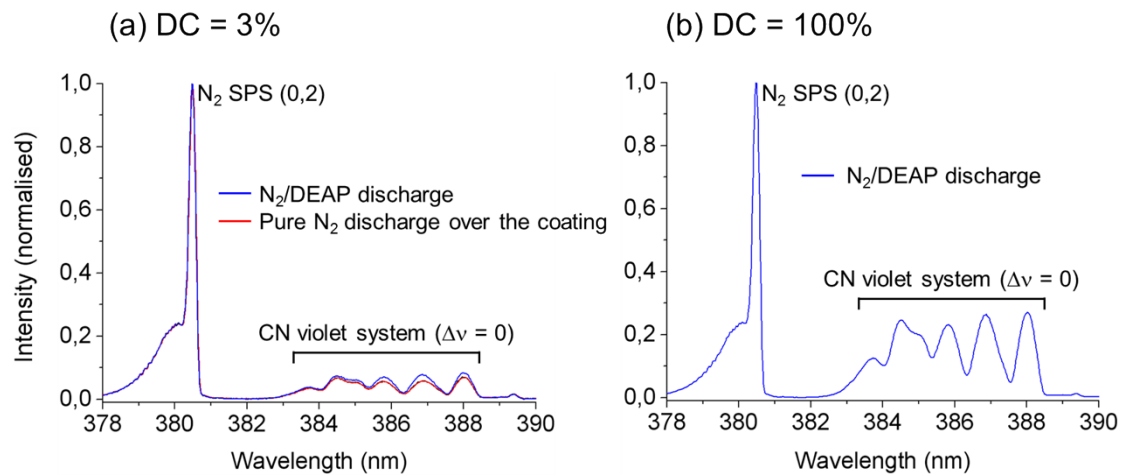

Figure S3. Evolution of the CN violet system emission ( $\Delta v = 0$ ) normalised to the  $\text{N}_2$  SPS ( $\text{C}^3\Pi_u \rightarrow \text{B}^3\Pi_g$ ,  $\Delta v = -2$ ).

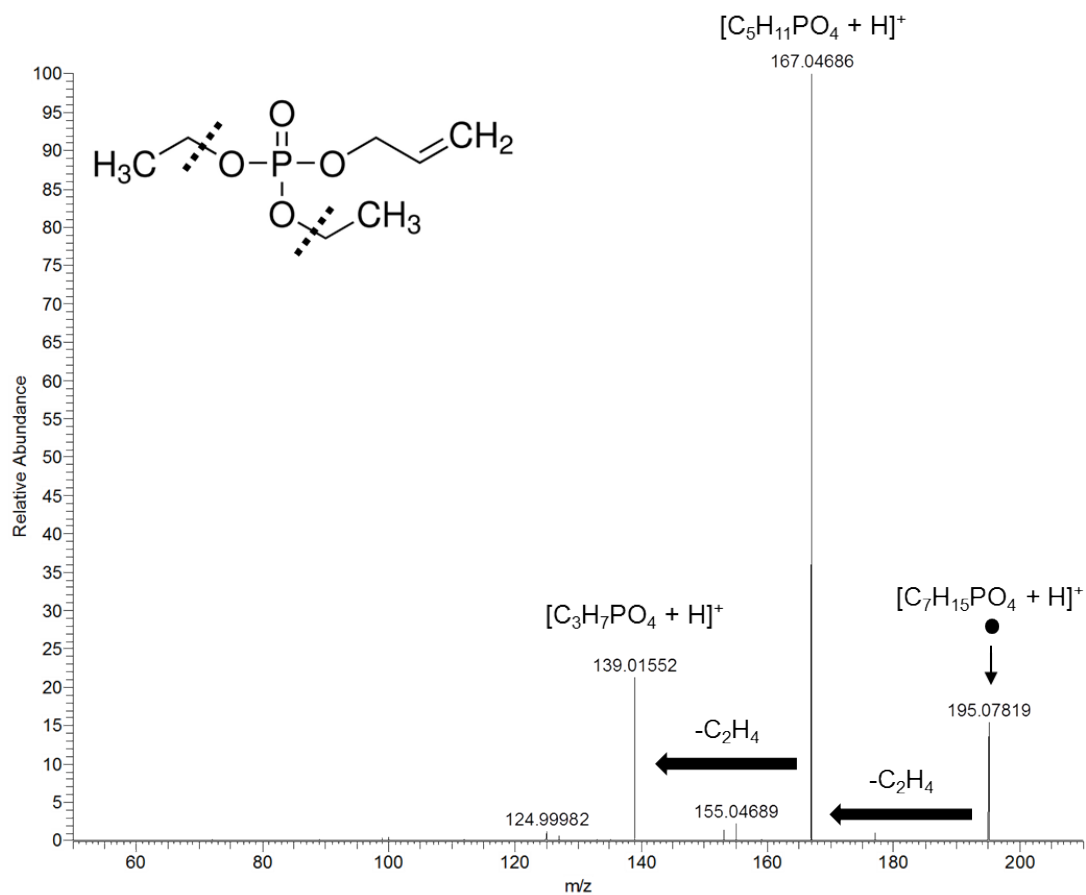

Figure S4. DART MS/MS of protonated DEAP (NCE=20) showing the loss of ethyl groups as preferential fragmentation pathway.
